# Supplementary material for: Amide-containing zinc(ii) metal–organic layered networks: a structure–CO2 capture relationship
Source: Royal Society of Chemistry journal article supplement (doi:10.1039/c4qi00241e), 2015-01-01
Supplement: c4qi00241e1.pdf [file c4qi00241e1.pdf]

Supporting Information for

**Amide-containing zinc(II) metal–organic layer networks: structure–CO<sub>2</sub>  
capture relationship**

**Cheng-Hua Lee,<sup>ab</sup> Jing-Yun Wu,<sup>\*c</sup> Gene-Hsiang Lee,<sup>d</sup> Shie-Ming Peng,<sup>d</sup> Jyh-Chiang Jiang,<sup>e</sup>  
and Kuang-Lieh Lu<sup>\*a</sup>**

*<sup>a</sup>Institute of Chemistry, Academia Sinica, Taipei 115, Taiwan. Fax: +886-2-27831237; E-mail: kllu@gate.sinica.edu.tw*

*<sup>b</sup>Graduate Institute of Applied Science and Technology, National Taiwan University of Science and Technology, Taipei 106, Taiwan*

*<sup>c</sup>Department of Applied Chemistry, National Chi Nan University, Nantou 545, Taiwan. E-mail: jyunwu@ncnu.edu.tw*

*<sup>d</sup>Department of Chemistry, National Taiwan University, Taipei 107, Taiwan*

*<sup>e</sup>Department of Chemical Engineering, National Taiwan University of Science and Technology, Taipei 106, Taiwan*

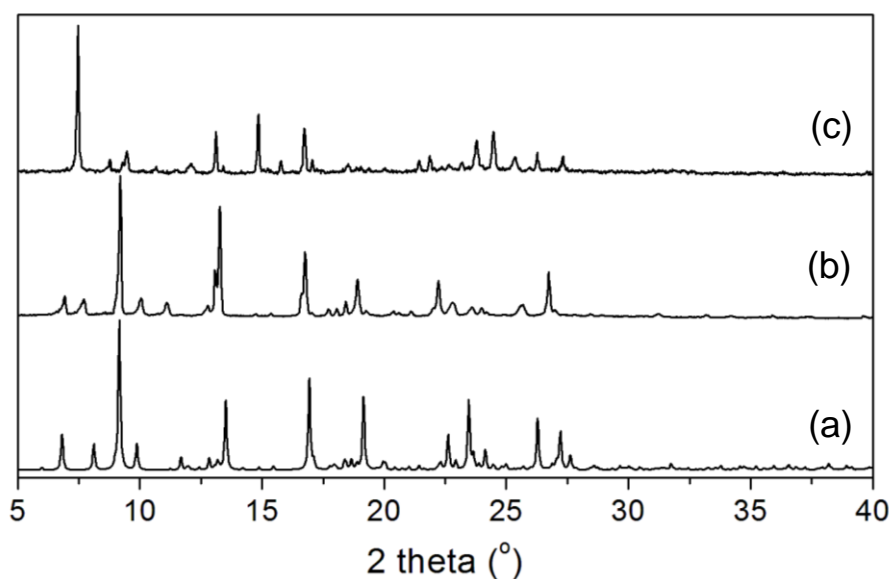

**Fig. S1** Powder X-ray diffractions of (a) simulated pattern of **1** from the single-crystal diffraction data and experimental patterns of (b) as-synthesized **1** and (c) dried **1** (**1'**) prepared after the heating at 120 °C for 2 h.

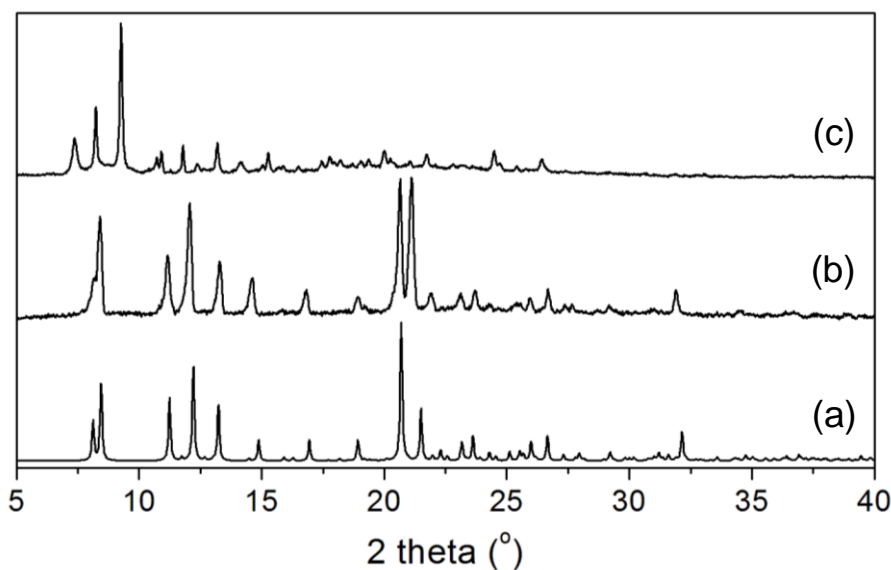

**Fig. S2** Powder X-ray diffractions of (a) simulated pattern of **2** from the single-crystal diffraction data and experimental patterns of (b) as-synthesized **2** and (c) thermal-activated **2** (**2'**) prepared after the heating at 120 °C for 2 h.

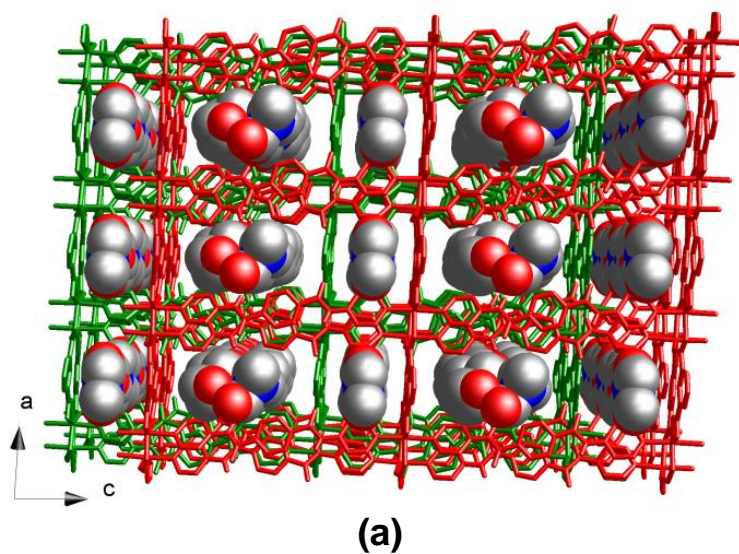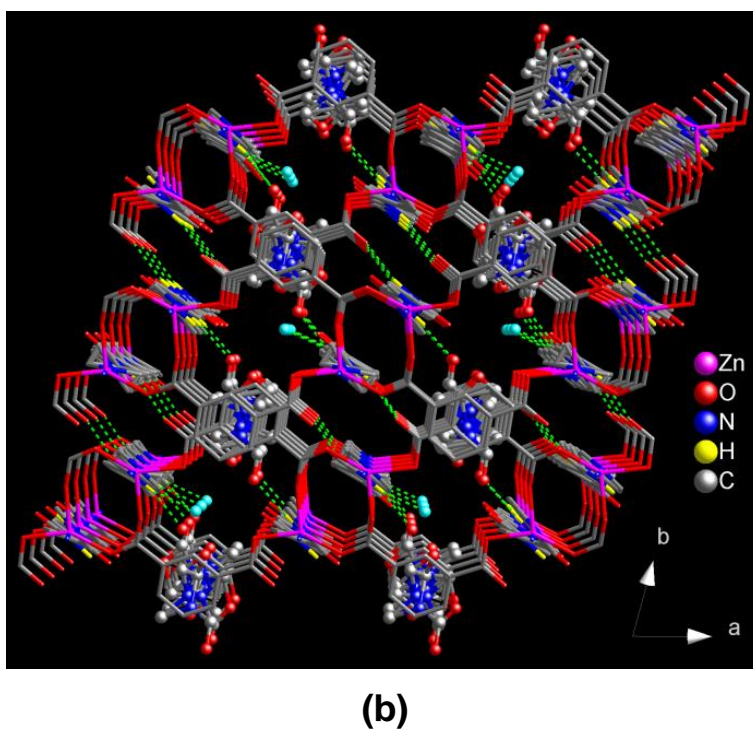

**Fig. S3** Views of the crystal packing in **1** (a) along the crystallographic [010] direction, showing 1D open channels in two different sizes where lattice DMF and H<sub>2</sub>O molecules reside, and (b) along the crystallographic [001] direction, showing the net-to-net and net-to-guest N–H···O hydrogen-bonding interactions (green dashed lines). Cyan color balls represent the lattice H<sub>2</sub>O molecules.

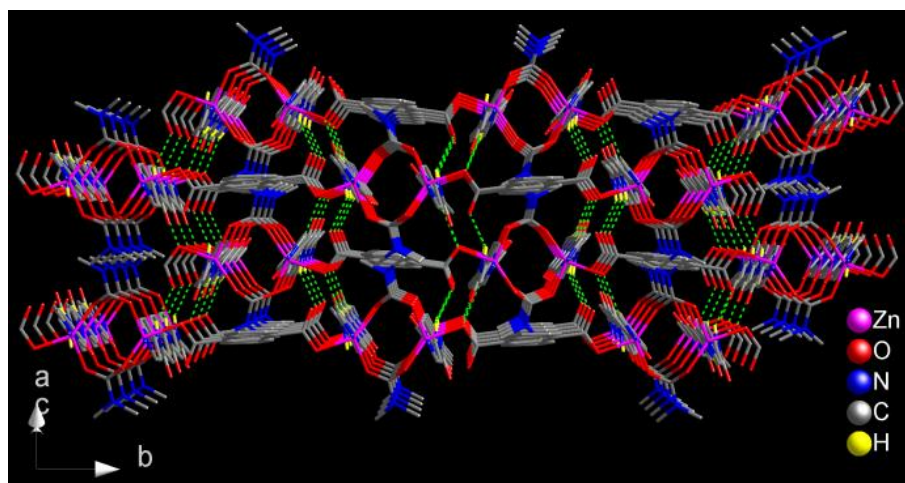

**Fig. S4** View of the crystal packing in **2** along the crystallographic  $[10\bar{1}]$  direction, showing the net-to-net N-H...O hydrogen-bonding interactions (green dashed lines).

**Table S1** Crystallographic data for compounds **1** and **2**

|                                                                                                                                                                                                                                                                                                                                     | <b>1</b>                                                                          | <b>2</b>                                                         |
|-------------------------------------------------------------------------------------------------------------------------------------------------------------------------------------------------------------------------------------------------------------------------------------------------------------------------------------|-----------------------------------------------------------------------------------|------------------------------------------------------------------|
| Empirical formula                                                                                                                                                                                                                                                                                                                   | C <sub>61</sub> H <sub>58</sub> N <sub>11</sub> O <sub>15.5</sub> Zn <sub>2</sub> | C <sub>27</sub> H <sub>22</sub> N <sub>5</sub> O <sub>6</sub> Zn |
| $M_w$                                                                                                                                                                                                                                                                                                                               | 1323.92                                                                           | 577.87                                                           |
| Crystal system                                                                                                                                                                                                                                                                                                                      | Triclinic                                                                         | Monoclinic                                                       |
| Space group                                                                                                                                                                                                                                                                                                                         | $P\bar{1}$                                                                        | $P2_1/c$                                                         |
| $a$ (Å)                                                                                                                                                                                                                                                                                                                             | 10.0677(3)                                                                        | 10.5340(2)                                                       |
| $b$ (Å)                                                                                                                                                                                                                                                                                                                             | 15.6039(5)                                                                        | 15.0561(2)                                                       |
| $c$ (Å)                                                                                                                                                                                                                                                                                                                             | 20.1092(5)                                                                        | 15.8443(3)                                                       |
| $\alpha$ (°)                                                                                                                                                                                                                                                                                                                        | 78.1845(10)                                                                       | 90                                                               |
| $\beta$ (°)                                                                                                                                                                                                                                                                                                                         | 83.2542(11)                                                                       | 96.9290(10)                                                      |
| $\gamma$ (°)                                                                                                                                                                                                                                                                                                                        | 73.8005(13)                                                                       | 90                                                               |
| $V$ (Å <sup>3</sup> )                                                                                                                                                                                                                                                                                                               | 2963.24(15)                                                                       | 2494.57(7)                                                       |
| $Z$                                                                                                                                                                                                                                                                                                                                 | 2                                                                                 | 4                                                                |
| $T$ (K)                                                                                                                                                                                                                                                                                                                             | 150(2)                                                                            | 100.0(1)                                                         |
| $\lambda$ (Å)                                                                                                                                                                                                                                                                                                                       | 0.71073                                                                           | 0.71073                                                          |
| $D_{calc}$ (g cm <sup>-3</sup> )                                                                                                                                                                                                                                                                                                    | 1.484                                                                             | 1.539                                                            |
| $F_{000}$                                                                                                                                                                                                                                                                                                                           | 1370                                                                              | 1188                                                             |
| $\mu$ (mm <sup>-1</sup> )                                                                                                                                                                                                                                                                                                           | 0.889                                                                             | 1.039                                                            |
| $\theta_{min}, \theta_{max}$ (deg)                                                                                                                                                                                                                                                                                                  | 1.04, 27.50                                                                       | 1.87, 26.37                                                      |
| Refl collected                                                                                                                                                                                                                                                                                                                      | 29444                                                                             | 19536                                                            |
| Unique refl, $R_{int}$                                                                                                                                                                                                                                                                                                              | 13415, 0.0428                                                                     | 5082, 0.0333                                                     |
| Obs refl [ $I > 2\sigma(I)$ ]                                                                                                                                                                                                                                                                                                       | 10720                                                                             | 4151                                                             |
| Parameters                                                                                                                                                                                                                                                                                                                          | 793                                                                               | 380                                                              |
| $R_1, {}^a wR_2^b$ [ $I > 2\sigma(I)$ ]                                                                                                                                                                                                                                                                                             | 0.0669, 0.1773                                                                    | 0.0356, 0.0841                                                   |
| $R_1, {}^a wR_2^b$ (all data)                                                                                                                                                                                                                                                                                                       | 0.0844, 0.1893                                                                    | 0.0484, 0.0903                                                   |
| GOF on $F^2$                                                                                                                                                                                                                                                                                                                        | 1.067                                                                             | 1.032                                                            |
| $\Delta\rho_{max}, \Delta\rho_{min}$ (e Å <sup>-3</sup> )                                                                                                                                                                                                                                                                           | 1.851, -1.139                                                                     | 0.586, -0.364                                                    |
| ${}^a R_1 = \sum \ F_o\  - \ F_c\  / \sum \ F_o\ $ . ${}^b wR_2 = \{ \sum [w(F_o^2 - F_c^2)^2] / \sum [w(F_o^2)^2] \}^{1/2}$ . $w = 1 / [\sigma^2(F_o^2) + (0.0792P)^2 + 10.0791P]$ where $P = (F_o^2 + 2F_c^2)/3$ for <b>1</b> ; $w = 1 / [\sigma^2(F_o^2) + (0.0416P)^2 + 1.6073P]$ where $P = (F_o^2 + 2F_c^2)/3$ for <b>2</b> . |                                                                                   |                                                                  |

**Table S2** Hydrogen-bond parameters in compounds **1** and **2**<sup>a</sup>

| D–H···A              | D–H (Å) | H···A (Å) | D···A (Å) | D–H···A (°) |
|----------------------|---------|-----------|-----------|-------------|
| <b>1</b>             |         |           |           |             |
| Net-to-net H-bonds   |         |           |           |             |
| N3–H···O12#1         | 0.88    | 2.05      | 2.90      | 160         |
| N7–H···O8#2          | 0.88    | 2.04      | 2.88      | 159         |
| Net-to-guest H-bonds |         |           |           |             |
| N2–H···O13#3         | 0.88    | 2.16      | 3.02      | 163         |
| N6–H···O16#4         | 0.88    | 2.12      | 2.96      | 160         |
| N6–H···O17#4         | 0.88    | 2.02      | 2.90      | 156         |
| <b>2</b>             |         |           |           |             |
| Net-to-net H-bonds   |         |           |           |             |
| N2–H···O1#1          | 0.84    | 2.23      | 3.03      | 160         |
| N4–H···O4#2          | 0.86    | 2.13      | 2.88      | 145         |

<sup>a</sup>Symmetry codes: For **1**: #1,  $-x + 1, -y, -z + 2$ ; #2,  $-x - 1, -y + 1, -z + 2$ ; #3,  $x - 1, y, z$ ; #4,  $x, y, z + 1$ . For **2**: #1,  $x, -y + 1/2, z - 1/2$ ; #2,  $x, -y + 1/2, z + 1/2$ .

### Estimation of isosteric heats of gas adsorption

A virial-type expression comprising the temperature independent parameters  $a_i$  and  $b_i$  was employed to calculate the enthalpies of adsorption for CO<sub>2</sub> (at 273 and 298 K) on **1'** and **2'**. In this case, the data were fitted using the equation:

$$\ln P = \ln N + 1/T \sum_{i=0}^m a_i N^i + \sum_{i=0}^n b_i N^i \quad (1)$$

Here,  $P$  is pressure,  $N$  is the amount adsorbed (or uptake),  $T$  is temperature,  $a_i$  and  $b_i$  are virial coefficients, and  $m$ ,  $n$  represent the number of coefficients required to adequately describe the isotherms ( $m$  and  $n$  were gradually increased until the contribution of extra added  $a$  and  $b$  coefficients was deemed to be statistically insignificant towards the overall fit, and the average value of the squared deviations from the experimental values was minimized). The values of the virial coefficients  $a_0$  through  $a_m$  were then used to calculate the enthalpies heats of adsorption using the following expression.

$$Q_{st} = -R \sum_{i=0}^m a_i N^i \quad (2)$$

$Q_{st}$  is the coverage-dependent isosteric heat of adsorption and  $R$  is the universal gas constant. The heat of CO<sub>2</sub> sorption for **1'** and **2'** in this manuscript is determined by using the excess sorption data in the pressure range from 0–1 atm (273 and 298 K), which is fitted by the virial-equation very well ( $R^2 > 0.999$ , Fig. S5).

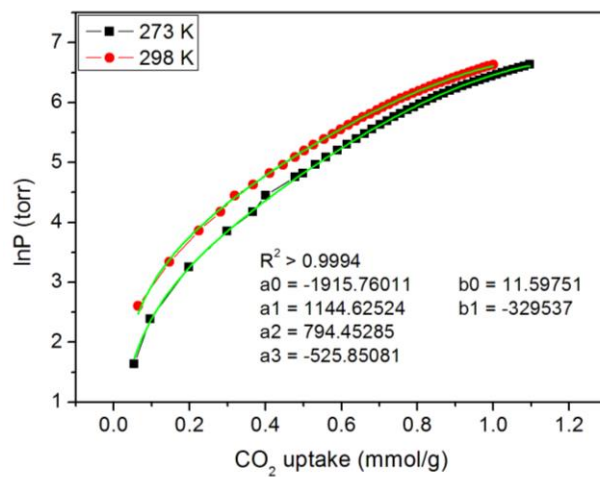

(a)

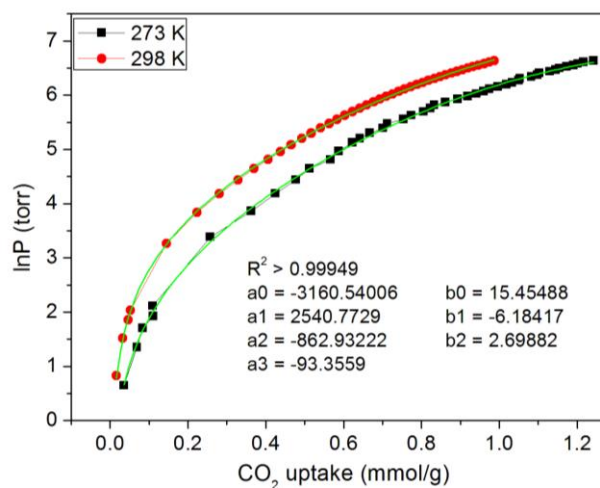

(b)

**Fig. S5** The CO<sub>2</sub> isotherms of (a) **1'** and (b) **2'** measured at 273 K and 298 K and the virial equation fits (lines).
